# Supplementary material for: An increase in hydrogen production from light and ethanol using a dual scale porosity photocatalyst
Source: Royal Society of Chemistry journal article supplement (doi:10.1039/c7gc03508j), 2018-01-01
Supplement: c7gc03508j1.pdf [file c7gc03508j1.pdf]

## **Supporting Information**

**Increase in hydrogen production from light and ethanol using a dual-scale porosity photocatalyst**

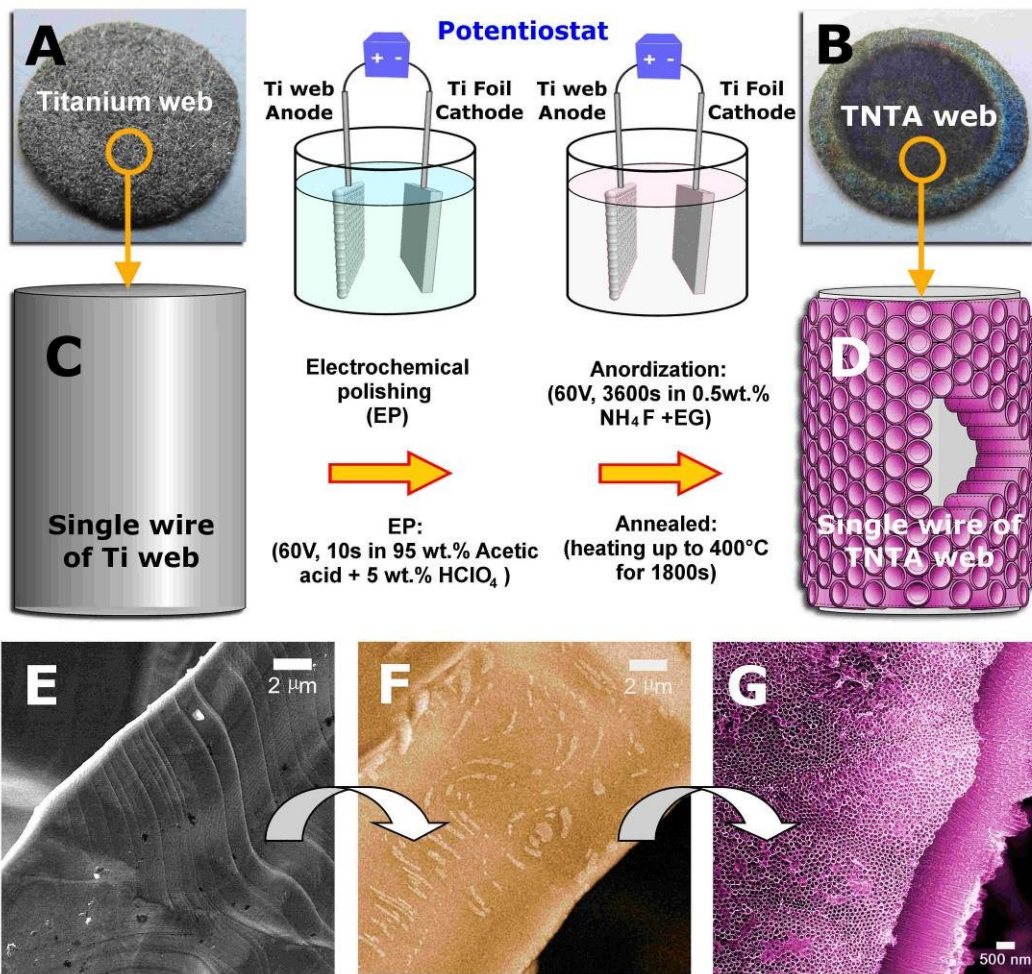

**Fig. S1** TNTA-web preparation

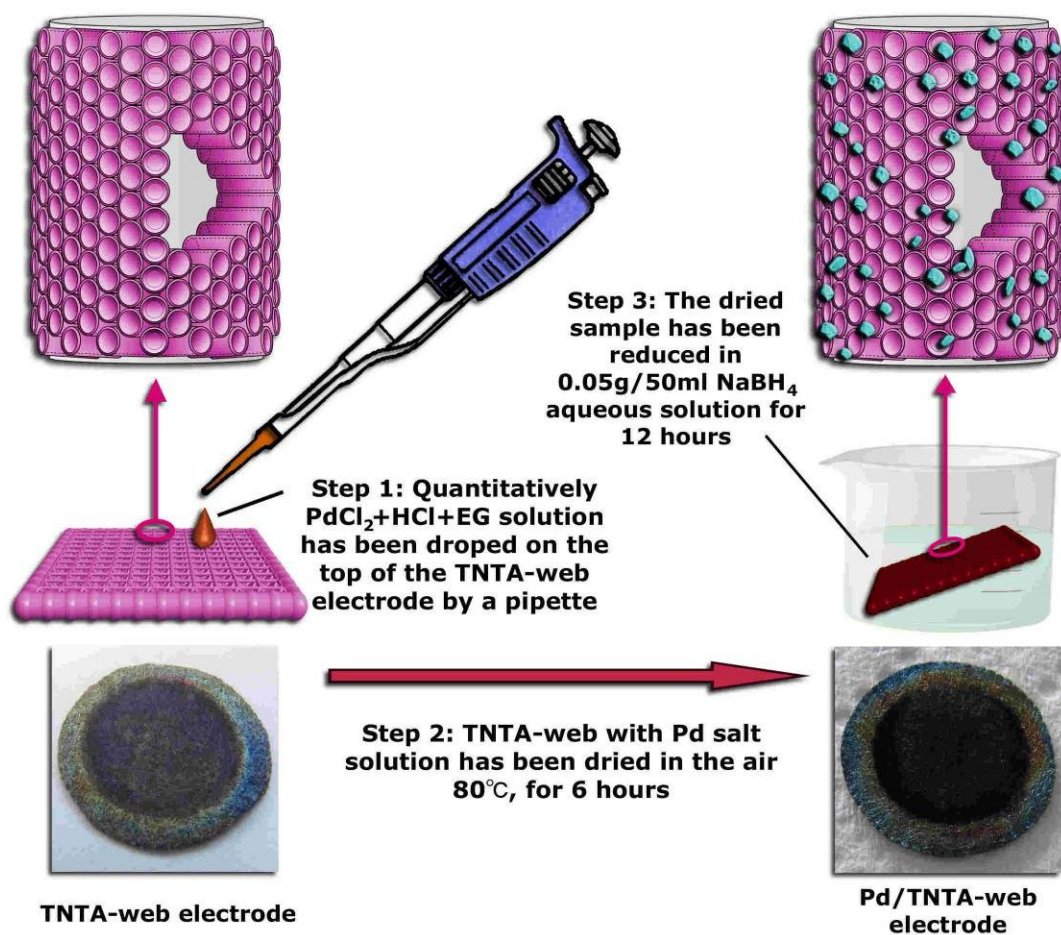

**Fig. S2** TNTA-web preparation
